# Supplementary material
Source: MDPI journal article supplement (https://www.mdpi.com/1424-8247/16/12/1671)
Supplement: s1 [file s1]

# Bioactive-Loaded Hydrogels Based on Bacterial Nanocellulose, Chitosan, and Poloxamer for Rebalancing Vaginal Microbiota

Angela Moraru <sup>1,2,†</sup>, Ștefan-Ovidiu Dima <sup>3,†</sup>, Naomi Tritcan <sup>3,4,†</sup>, Elena-Iulia Oprea <sup>5</sup>, Ana-Maria Prelipcean <sup>5</sup>, Bogdan Trică <sup>3</sup>, Anca Oancea <sup>5</sup>, Ionuț Moraru <sup>2</sup>, Diana Constantinescu-Aruxandei <sup>3,\*</sup> and Florin Oancea <sup>1,3,\*</sup>

<sup>1</sup> Faculty of Biotechnologies, University of Agronomic Sciences and Veterinary Medicine Bucharest, Bd. Mărăști Nr. 59, Sector 1, 011464 Bucharest, Romania; angela.moraru@pro-natura.ro

<sup>2</sup> S.C. Laboratoarele Medica Srl, Strada Frasinului Nr. 11, 075100 Otopeni, Romania; ionut.moraru@pro-natura.ro

<sup>3</sup> Polymers and Bioresources Departments, National Institute for Research and Development in Chemistry and Petrochemistry – ICECHIM, Splaiul Independentei Nr. 202, Sector 6, 060021 Bucharest, Romania; ovidiu.dima@icechim.ro (Ș.-O.D.); naomi.tritean@icechim.ro (N.T.); bogdan.trica@icechim.ro (B.T.)

<sup>4</sup> Faculty of Biology, University of Bucharest, Splaiul Independentei Nr. 91-95, Sector 5, 050095 Bucharest, Romania

<sup>5</sup> Department of Cellular and Molecular Biology, National Institute of Research and Development for Biological Sciences, Splaiul Independentei Nr. 296, Sector 6, 060031 Bucharest, Romania; iulia.oprea@incdsb.ro (E.-I.O.); anamaria.prelipcean@incdsb.ro (A.-M.P.); oancea.anca@gmail.com (A.O.)

\* Correspondence: diana.constantinescu@icechim.ro (D.C.-A.); florin.oancea@icechim.ro (F.O.); Tel.: +40-21-315-3299 (F.O.)

† These authors contributed equally to this work.

Starting from the individual spectra of bacterial nanocellulose previously obtained and characterized [1], and of chitosan and Poloxamer 407, Table S1 with the characteristic absorption bands was generated. If we look at the individual FTIR spectra and at their molecular structures, we observe a number of different C-O bonds in all three (bio)polymers, with particular absorption bands. Understanding each particular vibration-rotation signal induced by the IR light energy absorption will allow further understanding of interaction mechanism and hydrogels' structural, muco-adhesive and delivery properties.

In Figure S1, the absorption bands of O-H in bacterial nanocellulose and chitosan appear in the region 3600-3300 cm<sup>-1</sup>, while N-H in chitosan presents a wide absorption band between 3500-3000 cm<sup>-1</sup>. Poloxamer (PX) has only two -OH groups at chain ends and is hydrophobic at room temperature, therefore it does not give a spectral signal in this region. But PX has more intense bands in the region 3000-2700 cm<sup>-1</sup>, with a maximum at 2880 cm<sup>-1</sup>, characteristic for the C-H bonds vibration in -CH<sub>2</sub>- polymeric chains of tri-block PEG-PPG-PEG and of particular methyl group -CH<sub>3</sub> in PPG with the specific absorption peak at 2970 cm<sup>-1</sup>. The next diagnostic region, 2500-1700 cm<sup>-1</sup>, is specific for triple and double bonds, without any absorption bands for the BNC-CS-PX systems.

The last diagnostic region ( $1700\text{--}1500\text{ cm}^{-1}$ ) can be seen as the shrinking mirror of the  $3400\text{--}3000\text{ cm}^{-1}$  region at half wavenumbers, also specific for O-H and N-H and for hydrogen bonds with water [2]. In this region also occur the signals of intra-molecular H-bonds vibration  $\text{PyR-OH}\cdots\text{O}^{\text{H}}\text{-PyR}$  (where PyR refers to pyran ring) between neighbor glucopyranosic rings with absorption signal at  $1645\pm 5\text{ cm}^{-1}$  for dried BNC, respectively  $1651\pm 5\text{ cm}^{-1}$  for dried chitosan in Figure S1. Compared to BNC, chitosan has another band at  $1582\pm 10\text{ cm}^{-1}$  that can be assigned to intra-molecular H-bonds between  $-\text{NH}_2\cdots\text{HO}-$  [3,4]. The band at  $\approx 1650\text{ cm}^{-1}$  for chitosan is also known as the Amide I band of the remaining acetylated amino groups ( $-\text{NH-COCH}_3$ ), with the main influence belonging to C=O group, and it is being used to determine quantitatively with a good precision the deacetylation degree (DD, %) of chitin, respectively the degree of acetylation ( $\text{DA}=100\text{--DD}$ , %) of chitosan using FTIR [5-8]. The absorption band at  $\approx 1582\text{ cm}^{-1}$  is assigned to Amide II band in chitosan combined with Amine I, with the main influence assigned to  $-\text{NH}-$  group, and it is more susceptible to hydrogen bonding and peak variations in intensity and position, shifting from  $1595\text{ cm}^{-1}$  at low degrees of N-acetylation to  $1550\text{ cm}^{-1}$  at high %DA, which makes it unreliable for FTIR calculations of DA(DD), the best formula with simultaneous internal sample normalization being  $\text{DA}\%=(\text{A}_{1650}/\text{A}_{3450})\times 100/1.33$  [5]. According to this formula, the DA for the chitosan used for our ternary hydrogels is 21.64%, respectively DD=78.36% (DD > 75%, according to the supplier).

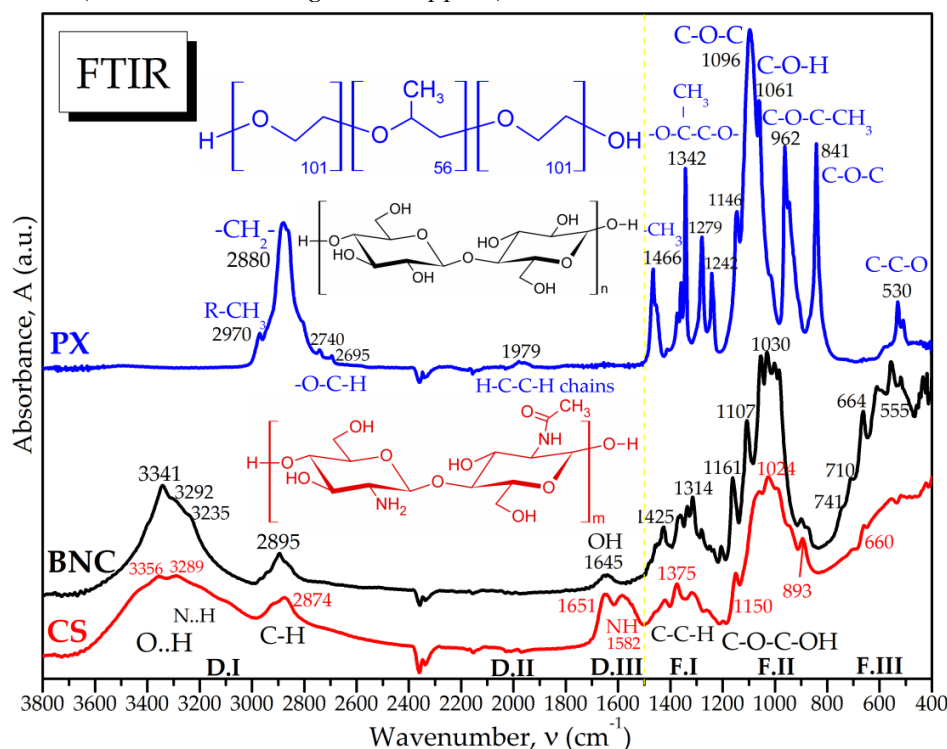

**Figure S1.** FTIR spectroscopy of ternary hydrogels components, respectively poloxamer (PX), bacterial nanocellulose (BNC) and chitosan (CS).

The fingerprint region 1500-400  $\text{cm}^{-1}$  is more complex and rich in absorption bands because at lower energies particular vibration-rotations in-plane and out-of-plane occur for all atoms. This region can be further divided in 3 sub-regions with particular characteristics, named fingerprint F.I, F.II, F.III, in Figure S1. The fingerprint sub-region F.I (1500-1200  $\text{cm}^{-1}$ ) can be seen as the sub-region of macro-structures stretching vibrations, where the IR energy is still high and induces asymmetric and symmetric vibrations of large molecular structures, in particular for these samples the glucopyranosic rings in cellulose and chitosan, respectively the polymeric three-block chains in PX, together with their additional functional groups. Comparative spectra analysis between BNC and CS, respectively BNC-CS-PX, allows a better assignment of specific absorption bands based on similarities and differences. PX has the first absorption band at 1466  $\text{cm}^{-1}$  with a shoulder at 1454  $\text{cm}^{-1}$  assigned to C-H, mainly -CH<sub>3</sub> in PPG, respectively -CH<sub>2</sub>-OH in PEG. For BNC/CS in F.I we can observe 9/6 weak-medium peaks, respectively 1456/1456, 1425/1420, 1369/1375, 1362/-, 1335/-, 1314/1317, 1281/-, 1248/1257 and 1206/1198  $\text{cm}^{-1}$ , assigned as presented in Table S1, hopefully more relevant than in our first study on BNC [1]. Although the glucopyranosyl ring is similar in cellulose as in chitin/chitosan, there are some spectral differences induced by the functional groups, starting with the band at 1425  $\text{cm}^{-1}$  having more shoulders and being more intense in BNC than CS due to more PyR-OH groups. The shoulder at 1456  $\text{cm}^{-1}$  in both BNC and CS might belong to a C-OH group involved in hydrogen bonds, most probable -C3H-OH group which is usually involved in a strong axial hydrogen bridge with the heterocyclic O of the neighbor ring. At 1369  $\text{cm}^{-1}$  for BNC, respectively at 1375  $\text{cm}^{-1}$  for CS we assigned the asymmetric stretching of C-O in PyR-C6-OH, while BNC has an additional peak at 1362  $\text{cm}^{-1}$  assigned to C2-OH, substituted in CS with the -NH<sub>2</sub> group. At 1206  $\text{cm}^{-1}$  for BNC, respectively 1198  $\text{cm}^{-1}$  for CS it appears a weak band, weaker for CS than BNC, which can be assigned to asymmetric stretching vibration of the glycosidic bond, while the symmetric stretching of PyR-O-PyR is assigned as the most intense band at 1024  $\text{cm}^{-1}$  for CS, respectively 1030  $\text{cm}^{-1}$  for BNC [4], as it will be argued in the F.II description.

In the F.I sub-region, PX has 3 types of C-O bonds with absorption bands at 1373, 1360 and 1342  $\text{cm}^{-1}$ , the first two corresponding to PEG chains, respectively -H<sub>2</sub>C-OH and HO-H<sub>2</sub>C-O-CH<sub>2</sub>- (-OH bending at 1361  $\text{cm}^{-1}$  [9]), while the third and the strongest peak corresponding to C-O-C in PPG chain with the heaviest atomic system -H<sub>2</sub>C-O-CH(-CH<sub>3</sub>)-CH<sub>2</sub>-. Further in the F.I sub-region for PX are the bands at 1279  $\text{cm}^{-1}$  assigned to -H<sub>2</sub>C-O-deformation vibrations in PEG chain blocks, with a band at 1242  $\text{cm}^{-1}$  assigned to >HC-O- deformation vibrations in PPG block.

The second fingerprint sub-region, F.II (1200-800  $\text{cm}^{-1}$ ), has the most intense absorption bands and is the most specific, since the medium IR energies here induce the deformation-rotation-vibration of all atomic bonds. This region is known as the polysaccharides band, characterized by C-O, O-C-O, C-OH, C-C and C-H deformation-rotation vibrations, while the sub-region 1200-1000  $\text{cm}^{-1}$  [10] (1150-1060  $\text{cm}^{-1}$  [4]) is particularly known as the region of ether bonds C-O-C, aliphatic or cyclic. The glycosidic bond PyR-O-PyR usually shows absorption bands for asymmetric stretching in the

region 1275-1200  $\text{cm}^{-1}$  and for symmetric stretching between 1075-1020  $\text{cm}^{-1}$  [4]. Starting with Poloxamer since has a simpler structure, we assigned the band at 1146  $\text{cm}^{-1}$  to the vibration deformation of marginal  $-\text{H}_2\text{C}-\text{OH}$ , at 1096  $\text{cm}^{-1}$  the deformation of  $-\text{H}_2\text{C}-\text{O}-\text{CH}_2-$  in lighter and longer PEG chains (C-O stretching at 1102  $\text{cm}^{-1}$  [9]),  $-\text{H}_2\text{C}-\text{O}-\text{CH}(-\text{CH}_3)-\text{CH}_2-$  in heavier PPG chain at 1061  $\text{cm}^{-1}$ , C-C-O-C in-plane vibration at 962  $\text{cm}^{-1}$  with C-C shoulder at 945  $\text{cm}^{-1}$ , ending with C-C deformation vibration in PEG polymeric chains at 841  $\text{cm}^{-1}$ . In the same F.II sub-region, chitosan has the lowest number of well-defined bands, at 1024  $\text{cm}^{-1}$  having the strongest signal that is usually assigned to the PyR-O-PyR glucopyranosic bond [11], flanked by 5 shoulders assigned to asymmetric and symmetric PyR-OH vibration at 1055 at 986  $\text{cm}^{-1}$ , cyclic C-O-C in glucopyranosic rings at 1150  $\text{cm}^{-1}$  most probable than glycosidic ring [12,13], respectively PyR-NH<sub>2</sub> at 941  $\text{cm}^{-1}$  and aromatic C-C at 893  $\text{cm}^{-1}$ . Cellulose has similar absorption bands, except the PyR-NH<sub>2</sub> band at 941  $\text{cm}^{-1}$ , with additional mention that in cellulose the spectral bands are better defined due to weaker intra-molecular hydrogen bonds. A particular band for cellulose at 1107  $\text{cm}^{-1}$  can be assigned to the C3-OH group substituted in chitosan with the -NH<sub>2</sub> group.

The last fingerprint sub-region, F.III (800-400  $\text{cm}^{-1}$ ), is the sub-region of simple bonds deformation vibrations in the presumed order of decreasing wavenumbers O-H, N-H, C-H, C-O, C-C and having the absorption bands assigned in Table S1, without particular aspects needed to be discussed.

Table S1. FTIR absorption bands of individual polymers BNC, CS and PX.

| Bond/group                                                                               | Wavenumber ( $\nu$ ), $\text{cm}^{-1}$ |                  |                     | Observations / References (main tools [2-4])                                                                                                                                                                                                                                |
|------------------------------------------------------------------------------------------|----------------------------------------|------------------|---------------------|-----------------------------------------------------------------------------------------------------------------------------------------------------------------------------------------------------------------------------------------------------------------------------|
|                                                                                          | BNC                                    | CS               | PX                  |                                                                                                                                                                                                                                                                             |
|                                                                                          |                                        |                  |                     | BNC-bacterial nanocellulose, CS-chitosan, PX-Poloxamer 407 (PEG-PPG-PEG), PyR-pyran ring                                                                                                                                                                                    |
| -H bonds with -OH                                                                        | s3341±200                              | s3360±100        | -                   | O-H bond (459 kJ/mol) is stronger than N-H (386 kJ/mol) and vibrates at a higher frequency; CS has two small peaks, around 3360 for -OH and at 3292 for -NH <sub>2</sub> ;                                                                                                  |
| -H bonds with -NH <sub>2</sub>                                                           | -                                      | s3292±200        | -                   |                                                                                                                                                                                                                                                                             |
| H bridge with -OH                                                                        | sh2970,<br>sh2943                      | sh2924           | sh2970              | -asym. $\nu\text{CH}_3$ at 2962 $\text{cm}^{-1}$ , -CH <sub>3</sub> in PPG;<br>-H bridge with bound -OH, in correlation with the region at half $\nu=1485\text{-}1455 \text{ cm}^{-1}$ ;                                                                                    |
| C-H in -CH <sub>3</sub> , >CH <sub>2</sub>                                               | s2895±70                               | s2874±50         | vs2880±90<br>sh2860 | -C-H in BNC [1] and CS [14];<br>-CH <sub>3</sub> in PPG has the strongest signal at 2880 $\text{cm}^{-1}$ , with a shoulder at 2860 $\text{cm}^{-1}$ for -CH <sub>2</sub> -;                                                                                                |
| O-H in -CH <sub>2</sub> -OH                                                              | -                                      | -                | w2740               | - bound -OH at chain ends;                                                                                                                                                                                                                                                  |
| H in C-H                                                                                 | -                                      | -                | w2695               | - alone H in C-H bond to -CH <sub>3</sub> in PPG;                                                                                                                                                                                                                           |
| C-H, C-C                                                                                 | -                                      | -                | w1979±50            | -particular for aliphatic chains in PX;                                                                                                                                                                                                                                     |
| -OH in PyR-OH, PyR-CH <sub>2</sub> -OH                                                   | s1638±60<br>m1645±50                   | -                | -                   | - OH functional groups in cellulose involved in H-bonds with H <sub>2</sub> O, as evidenced in Fig.FTIR3;                                                                                                                                                                   |
| C=O in amide I and H-bonds with PyR-OH                                                   | -                                      | s1651            | -                   | Amide I [14,15]; -OH and H-bonds of N-acetyl group in partially deacetylated CS;                                                                                                                                                                                            |
| C-N-H in amide II                                                                        | -                                      | s1582            | -                   | Amide II [14,15]; around 1595 at low DA, 1550 high DA & chitin; -H bonding increases the $\nu$ of amide II;                                                                                                                                                                 |
| C-H coupled with >CH-OH, and correlated with H-bridge at 2xWN 2920-2970 $\text{cm}^{-1}$ | sh1462<br>sh1456                       | sh1462<br>sh1456 | s1466,<br>sh1454    | - $\delta\text{C-H}$ in saccharides [2] with a shoulder for, most probably, -C6H <sub>2</sub> -OH in Bnc and CS;<br>-CH <sub>3</sub> in PPG gives the most specific band for PX at 1466 $\text{cm}^{-1}$ with a shoulder at 1454 $\text{cm}^{-1}$ for -CH <sub>2</sub> -O-; |

|                                                                             |                |          |            |                                                                                                                                                                                                                                                                              |
|-----------------------------------------------------------------------------|----------------|----------|------------|------------------------------------------------------------------------------------------------------------------------------------------------------------------------------------------------------------------------------------------------------------------------------|
| -CH <sub>2</sub> -OH<br>PyR-OH                                              | m1425          | w1420    | vw1412     | -OH [15], more intense (m) in BNC than in CS (w) due to higher number of -OH, band highly susceptible for hydrogen bonding / hydration;<br>- (vw) in PX with only two -CH <sub>2</sub> -OH at chain ends;                                                                    |
| C-O in C-OH, Ar-C6-OH,<br>O-C(=O)-CH <sub>3</sub>                           | w1369          | m1375    | w1373      | -C-O and C-H, weak in all samples, but best delimited in CS due to -CO-CH <sub>3</sub> in heavier acetyl moieties that increase asymmetry [14,15];                                                                                                                           |
| -OH in >CH-OH,<br>-CH <sub>2</sub> -OH                                      | w1362          | -        | m1360      | - the vibration of >C2H-OH present in BNC but absent in CS, respectively -CH <sub>2</sub> -O- in PX [9];                                                                                                                                                                     |
| -CH <sub>2</sub> -O-CH <sub>2</sub> -                                       | w1335          | -        | s1342      | -PX has 3 types of C-O bonds (-H <sub>2</sub> C-OH, -H <sub>2</sub> C-O-CH <sub>2</sub> - and -H <sub>2</sub> C-O-CH(CH <sub>3</sub> )-CH <sub>2</sub> -), the heaviest group being the last one, giving the strongest peak;                                                 |
| C-N in Amide III PyR-<br>NH-CO-CH <sub>3</sub><br>and PyR-O-PyR chain       | -              | w1317±30 | -          | - quite large band for C-N and C=O in Amide III band of partially acetylated chitosan moieties [14,15], possible coupled with glycosidic bond chain bending;                                                                                                                 |
| Hypothetically<br>PyR-O-PyR glycosidic<br>linkage and chain effect          | m1314          | -        | -          | -band absent in mono- and oligosaccharides [2], or assigned for -CH <sub>2</sub> - [16], or as above for CS, a hypothetically band for chain bending / oscillation at the glycosidic linkage PyR-O-PyR;                                                                      |
| C-H in -CH <sub>2</sub> -O-                                                 | w1281          | -        | s1279      | C-H in PEG block chain;                                                                                                                                                                                                                                                      |
| -CH <sub>2</sub> -O-CH <sub>2</sub> -                                       | w1248<br>w1234 | w1257    | s1242      | -C-O- [15], most probable triple-bonded C in >CH-O-, also >CH-O- in PPG block chain;                                                                                                                                                                                         |
| -CH <sub>2</sub> -OH, -C6H <sub>2</sub> -OH                                 | w1206          | w1198    | -          | -bending of -CH <sub>2</sub> -OH (most probable -C6H <sub>2</sub> -OH), weaker in CS than BNC due to stronger -OH...NH <sub>2</sub> -intramolecular H bonds, similar with trehalose, maltose and maltotriose [2];                                                            |
| PyR-O-PyR glycosidic<br>link<br>C-O-C cyclic / aliphatic<br>PyR-C-OH / C-OH | m1161          | m1150    | s1146      | -PyR-O-PyR asymmetric stretching of glycosidic linkage in polysaccharides [15,17]<br>- C-O-C cyclic in glucopyranosic rings, C-O-C aliphatic in PX, PEG chains [10]<br>- PyR-CH <sub>2</sub> -OH in BNC and CS [14], respectively chain ends -CH <sub>2</sub> -OH in PEG-PX; |
| PyR-OH / C-O                                                                | m1107          | -        | vs1096     | C3-OH in BNC, respectively C-O-C in PEG-PX [9,10];                                                                                                                                                                                                                           |
| C-O-C aliphatic                                                             | -              |          | s1061      | -aliphatic C-O-C, C-O-C< in PPG-PX;                                                                                                                                                                                                                                          |
| PyR-OH                                                                      | s1055          | w1059    | -          | C2-OH in BNC and CS [15];                                                                                                                                                                                                                                                    |
| PyR-O-PyR                                                                   | s1030          | s1024    | -          | -symmetric stretching of PyR-O-PyR glycosidic bond;<br>-C-O in CS [14,15];                                                                                                                                                                                                   |
| C-OH / C-O                                                                  | m1001          | -        | sh1015     | -symmetric C3-O vibration in BNC ;                                                                                                                                                                                                                                           |
| PyR-O-PyR / C-O-C/ C-C                                                      | m984           | m986     | s962 sh945 | - glycosidic linkage in poly/oligo/saccharides [17], absent in monosaccharides and most affected by acidic hydrolysis of oligosaccharides [2], respectively C-O-C in-plane vibration with C-C shoulder in PX;                                                                |
| PyR-NH <sub>2</sub> / C-N                                                   | -              | w941     | -          | C-N in PyR-NH <sub>2</sub> for chitosan;                                                                                                                                                                                                                                     |
| PyR-O-PyR                                                                   | w899           | w893     | -          | - glycosidic link [15,18]                                                                                                                                                                                                                                                    |
| PyR-C / C-C                                                                 | w872           | -        | vs841      | - PyR-C in PyR-C-OH moiety for BNC has a higher liberty of vibration than the similar one in CS, while for PX vibrates C-C in polymeric chains;                                                                                                                              |
| O-H                                                                         | w744,710       | -        | -          | - in-plane scissoring and rocking vibrations of O-H in BNC;                                                                                                                                                                                                                  |
| O-H, N-H                                                                    | -              | w708     | -          | - in-plane scissoring and rocking vibrations of O-H and                                                                                                                                                                                                                      |

|         |      |      |      |                                                    |
|---------|------|------|------|----------------------------------------------------|
|         |      |      |      | N-H in CS;                                         |
| PyR C-H | m664 | w660 | -    | - in-plane rocking vibrations of heterocyclic C-H; |
| C-H     | w610 | -    | w584 | - in-plane rocking vibrations of aliphatic C-H;    |
| C-O     | m555 | w554 | m530 | - in-plane rocking vibrations of C-O;              |
| C-C     | <510 | <510 | <510 | - in-plane rocking vibrations of C-C.              |

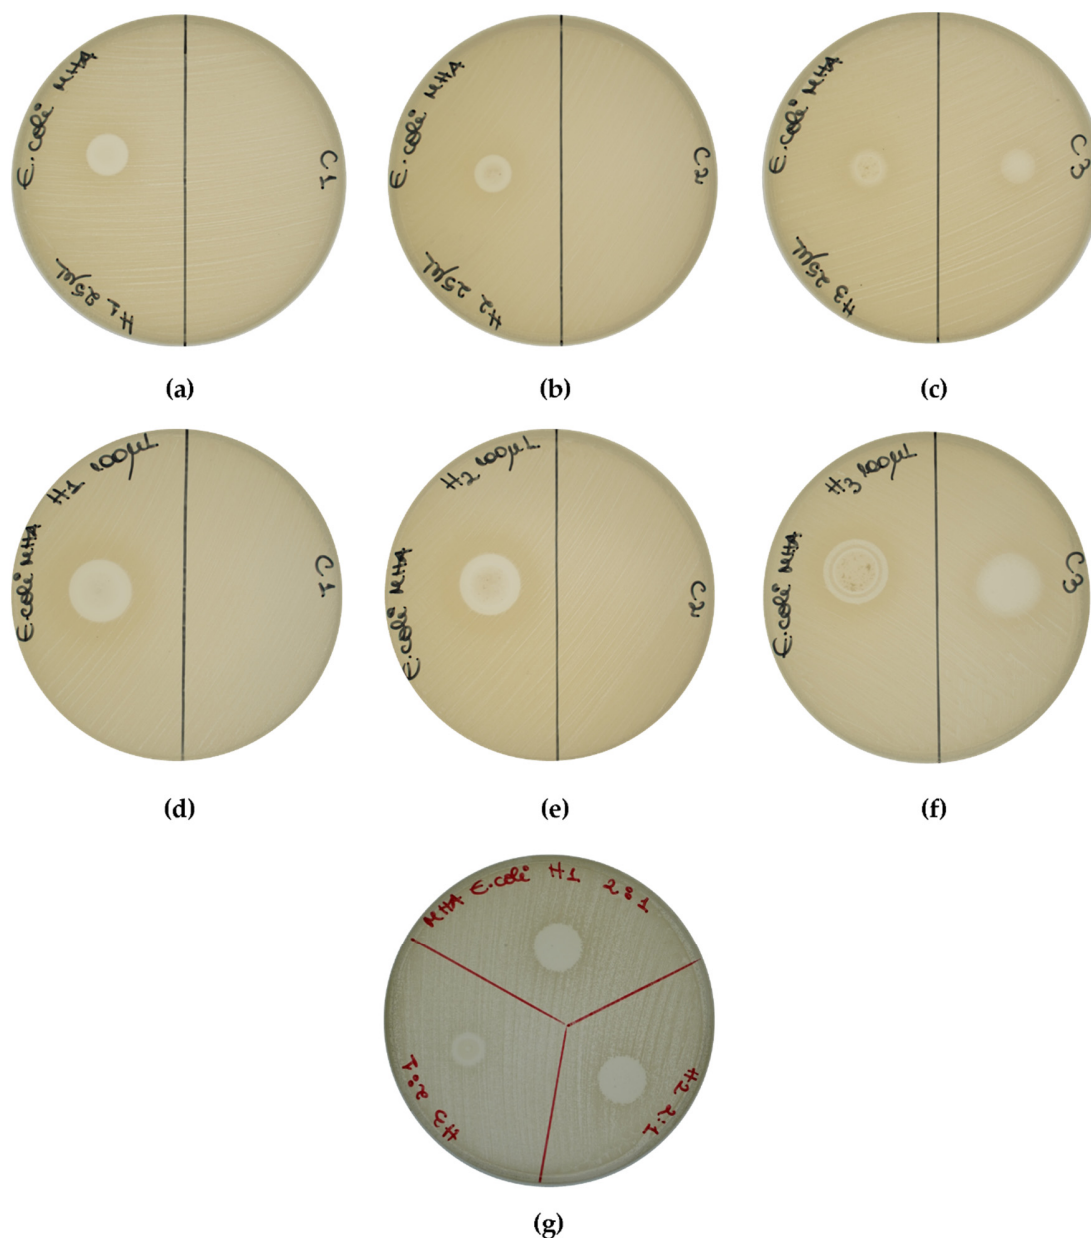

**Figure S2.** Qualitative screening of antibacterial activity: (a); Inhibition zone for *E. coli* treated with 25  $\mu$ L H1, and C1; (b) Inhibition zone for *E. coli* treated with 25  $\mu$ L H2, and C2; (c) Inhibition zone for *E. coli* treated with 25  $\mu$ L H3, and C3; (d) Inhibition zone for *E. coli* treated with 100  $\mu$ L H1, and C1; (e) Inhibition zone for *E. coli* treated with 100  $\mu$ L H2, and C2; (f)

Inhibition zone for *E. coli* treated with 100  $\mu$ L H3, and C3;(g) Inhibition zone for *E. coli* treated with 25  $\mu$ L 2:1 (v/v) diluted H1, H2, and H3; H1 – Hydrogel 1, H2 – Hydrogel 2, H3 – Hydrogel 3, C1 – Control of H1, C2 – Control of H2, C3 – Control of H3.

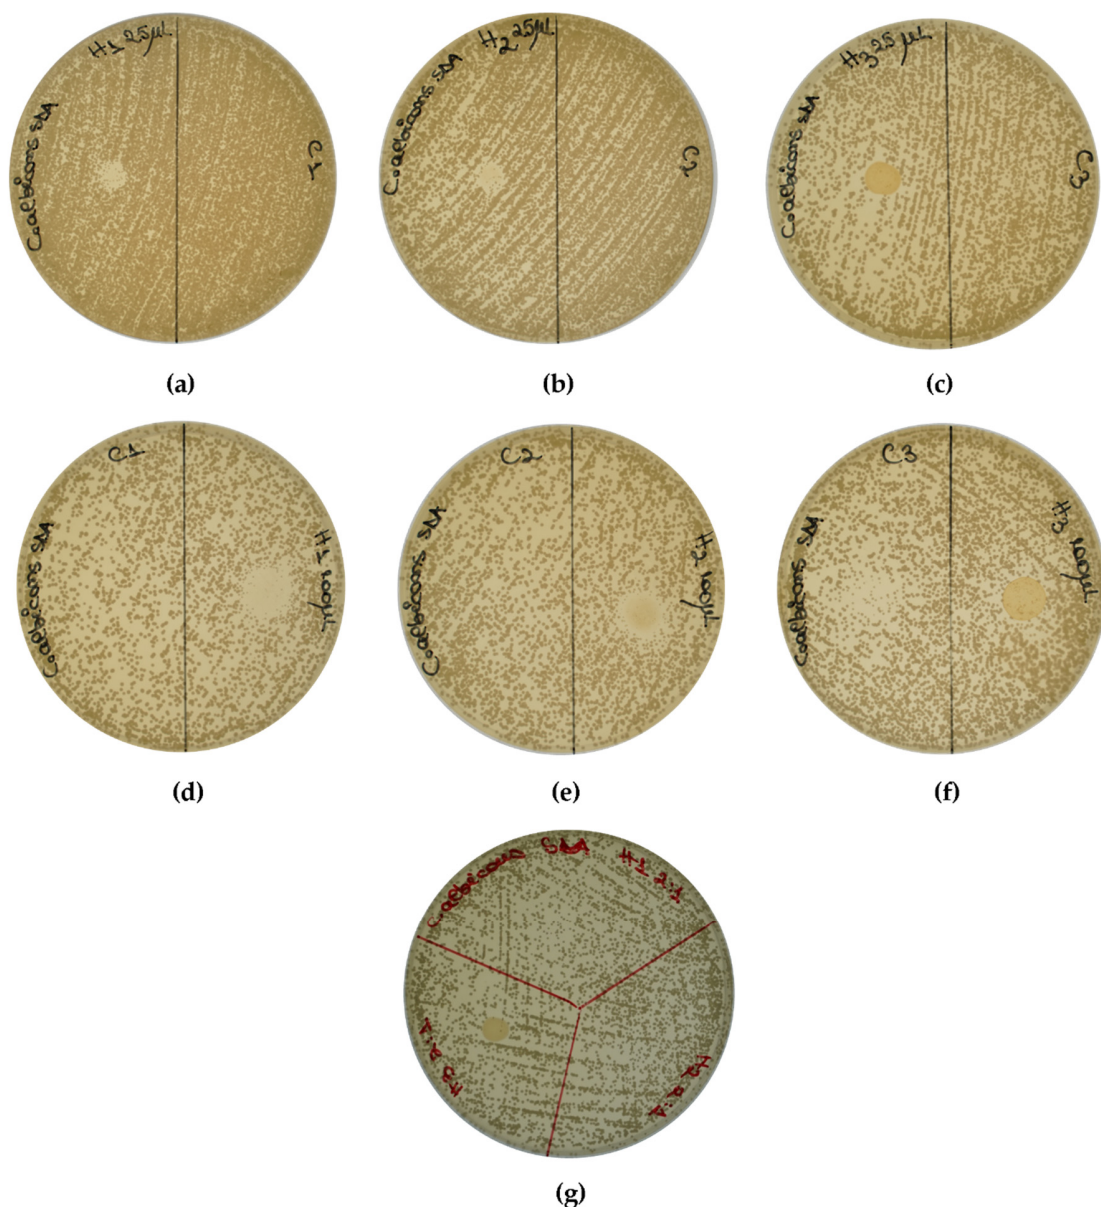

**Figure S3.** Qualitative screening of antimicrobial activity: (a); Inhibition zone for *C. albicans* treated with 25  $\mu$ L H1, and C1; (b) Inhibition zone for *C. albicans* treated with 25  $\mu$ L H2, and C2; (c) Inhibition zone for *C. albicans* treated with 25  $\mu$ L H3, and C3; (d) Inhibition zone for *C. albicans* treated with 100  $\mu$ L H1, and C1; (e) Inhibition zone for *C. albicans* treated with 100  $\mu$ L H2, and C2; (f) Inhibition zone for *C. albicans* treated with 100  $\mu$ L H3, and C3; (g) Inhibition

zone for *C. albicans* treated with 25  $\mu$ L 2:1 (v/v) diluted H1, H2, and H3; H1 – Hydrogel 1, H2 – Hydrogel 2, H3 – Hydrogel 3, C1 – Control of H1, C2 – Control of H2, C3 – Control of H3.



**Table S2.** Rheological models and parameters for H1, H2 and H3 hydrogels, with and without mucin, in flow sweep mode.

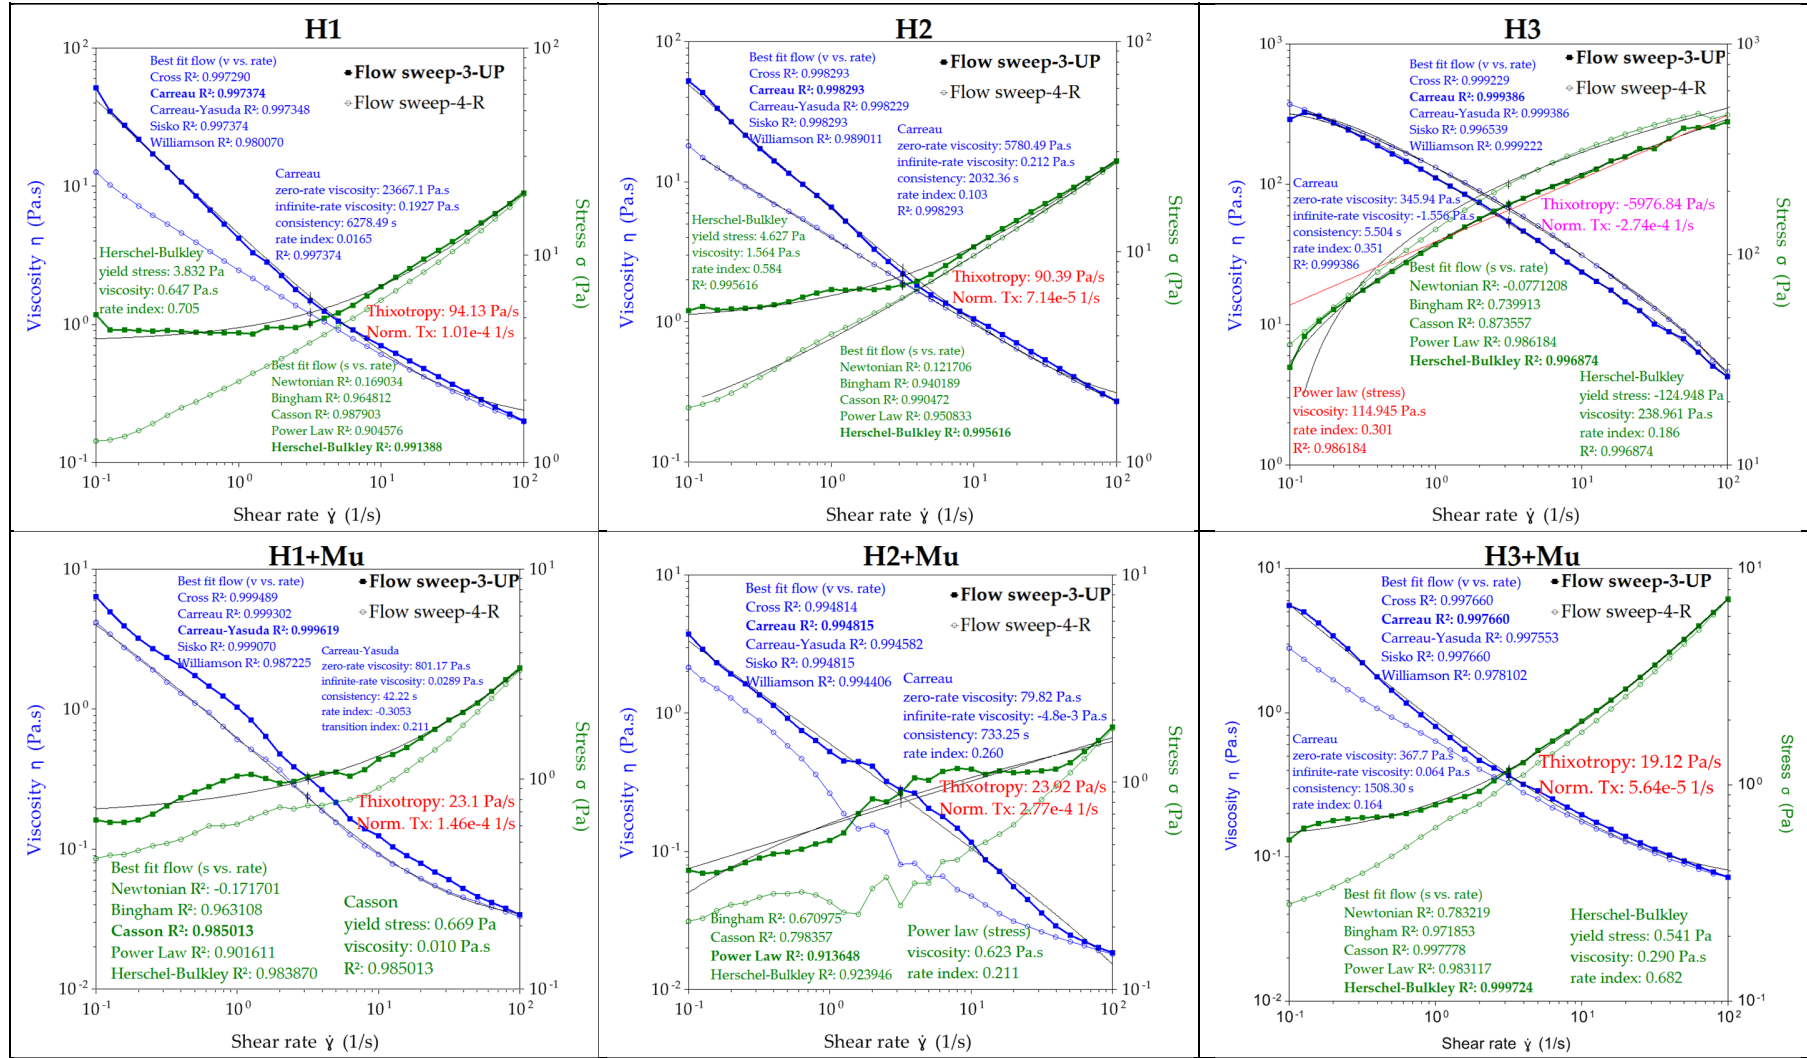

## References

1. Dima, S.-O.; Panaitescu, D.-M.; Orban, C.; Ghiurea, M.; Doncea, S.-M.; Fierascu, R.C.; Nistor, C.L.; Alexandrescu, E.; Nicolae, C.-A.; Trica, B.; et al. Bacterial Nanocellulose from Side-Streams of Kombucha Beverages Production: Preparation and Physical-Chemical Properties. *Polymers* **2017**, *9*, doi:10.3390/polym9080374.
2. Kacurakova, M.; Mathlouthi, M. FTIR and laser-Raman spectra of oligosaccharides in water: Characterization of the glycosidic bond. *Carbohydrate Research* **1996**, *284*, 145-157.
3. Thomas, S.; Socrates, G. Spectroscopic tools; Infrared and Raman Characteristic Group frequencies. Available online: (accessed on June 2022).
4. Balaban, A.T.; Banciu, M.; Pogany, I.I. *Aplicatii ale metodelor fizice in chimica organica-RO (Applications of physical methods in organic chemistry)*; Editura Stiintifica si Enciclopedica: Bucuresti, 1983; p. 288.
5. Domszy, J.G.; Roberts, G.A.F. Evaluation of infrared spectroscopic techniques for analysing chitosan. *Die Makromolekulare Chemie* **1985**, *186*, 1671-1677, doi:https://doi.org/10.1002/macp.1985.021860815.
6. Baxter, A.; Dillon, M.; Taylor, K.D.; Roberts, G.A. Improved method for i.r. determination of the degree of N-acetylation of chitosan. *Int J Biol Macromol* **1992**, *14*, 166-169, doi:10.1016/s0141-8130(05)80007-8.
7. Khan, T.A.; Peh, K.K.; Ch'ng, H.S. Reporting degree of deacetylation values of chitosan: the influence of analytical methods. *J Pharm Pharm Sci* **2002**, *5*, 205-212.
8. Dash, M.; Chiellini, F.; Fernandez, E.G.; Piras, A.M.; Chiellini, E. Statistical approach to the spectroscopic determination of the deacetylation degree of chitins and chitosans. *Carbohydrate Polymers* **2011**, *86*, 65-71, doi:https://doi.org/10.1016/j.carbpol.2011.04.010.
9. Van Ngo, H.; Park, C.; Tran, T.T.D.; Nguyen, V.; Lee, B.J. Mechanistic understanding of salt-induced drug encapsulation in nanosuspension via acid-base neutralization as a nanonization platform technology to enhance dissolution rate of pH-dependent poorly water-soluble drugs. *European Journal of Pharmaceutics and Biopharmaceutics* **2020**, *154*, 8-17, doi:10.1016/j.ejpb.2020.07.001.
10. Cabana, A.; AitKadi, A.; Juhasz, J. Study of the gelation process of polyethylene oxide(a) polypropylene oxide(b) polyethylene oxide(a) copolymer (Pluronic 407) aqueous solutions. *Journal of Colloid and Interface Science* **1997**, *190*, 307-312, doi:10.1006/jcis.1997.4880.
11. Abbasi, A.R.; Sohail, M.; Minhas, M.U.; Khaliq, T.; Kousar, M.; Khan, S.; Hussain, Z.; Munir, A. Bioinspired sodium alginate based thermosensitive hydrogel membranes for accelerated wound healing. *International Journal of Biological Macromolecules* **2020**, *155*, 751-765, doi:10.1016/j.ijbiomac.2020.03.248.
12. Fonseca-Garcia, A.; Caicedo, C.; Jimenez-Regalado, E.J.; Morales, G.; Aguirre-Loredo, R.Y. Effects of Pluronic Content and Storage Time of Biodegradable Starch-Chitosan Films on Its Thermal, Structural, Mechanical, and Morphological Properties. *Polymers* **2021**, *13*, 10, doi:10.3390/polym13142341.
13. Bashir, M.; Syed, H.K.; Asghar, S.; Irfan, M.; Almalki, W.H.; Menshaw, S.A.; Khan, I.U.; Shah, P.A.; Khalid, I.; Ahmad, J.; et al. Effect of Hydrophilic Polymers on Complexation Efficiency of Cyclodextrins in Enhancing Solubility and Release of Diflunisal. *Polymers* **2020**, *12*, 17, doi:10.3390/polym12071564.

14. Costa, E.D.; Pereira, M.M.; Mansur, H.S. Properties and biocompatibility of chitosan films modified by blending with PVA and chemically crosslinked. *Journal of Materials Science-Materials in Medicine* **2009**, *20*, 553-561, doi:10.1007/s10856-008-3627-7.
15. Molina, R.; Jovancic, P.; Vilchez, S.; Tzanov, T.; Solans, C. In situ chitosan gelation initiated by atmospheric plasma treatment. *Carbohydrate Polymers* **2014**, *103*, 472-479, doi:10.1016/j.carbpol.2013.12.084.
16. Kacurakova, M.; Smith, A.C.; Gidley, M.J.; Wilson, R.H. Molecular interactions in bacterial cellulose composites studied by 1D FT-IR and dynamic 2D FT-IR spectroscopy. *Carbohydrate Research* **2002**, *337*, 1145-1153, doi:10.1016/s0008-6215(02)00102-7.
17. Nikonenko, N.A.; Buslov, D.K.; Sushko, N.I.; Zhbankov, R.G. Investigation of stretching vibrations of glycosidic linkages in disaccharides and polysaccharides with use of IR spectra deconvolution. *Biopolymers* **2000**, *57*, 257-262, doi:10.1002/1097-0282(2000)57:4<257::aid-bip7>3.0.co;2-3.
18. Kruer-Zerhusen, N.; Cantero-Tubilla, B.; Wilson, D.B. Characterization of cellulose crystallinity after enzymatic treatment using Fourier transform infrared spectroscopy (FTIR). *Cellulose* **2018**, *25*, 37-48, doi:10.1007/s10570-017-1542-0.
